# Supplementary material
Source: ML conference proceedings conference paper supplement (https://openreview.net/forum?id=vtVDI3w_BLL)
Supplement: supplementary_material [file attachment]

## A MORE ABLATION TABLES

Table 3: Varying number of sampled objectives per-iteration.

| Task       | $\frac{3}{24}$ tasks         | $\frac{6}{24}$ tasks         |
|------------|------------------------------|------------------------------|
| ACL-ARC    | 72.11 <sub>2.12</sub>        | <b>73.26</b> <sub>1.32</sub> |
| SCIERC     | 82.35 <sub>1.76</sub>        | <b>82.98</b> <sub>1.52</sub> |
| SE-2016-6  | <b>72.46</b> <sub>1.65</sub> | <b>72.46</b> <sub>0.90</sub> |
| CHEMPROT   | <b>83.91</b> <sub>0.32</sub> | 83.69 <sub>0.98</sub>        |
| H.PARTISAN | <b>98.46</b> <sub>0.0</sub>  | 97.95 <sub>0.73</sub>        |

## B DATASET DETAILS

Table 4: Specifications of datasets used to evaluate our methods.

| Domain | Task                               | Label Type              | Train Size | Dev Size | Test Size | Classes | Metric   |
|--------|------------------------------------|-------------------------|------------|----------|-----------|---------|----------|
| BIOMED | CHEMPROT (Kringelum et al. (2016)) | relation classification | 4169       | 2427     | 3469      | 13      | Accuracy |
| CS     | SCIERC (Luan et al. (2018))        | relation classification | 3219       | 455      | 974       | 7       | F1       |
| STANCE | SE-2016-6 (Mohammad et al. (2016)) | stance detection        | 2497       | 417      | 1249      | 3       | Accuracy |
| CS     | ACL-ARC (Jurgens et al. (2018))    | citation intent         | 1688       | 114      | 139       | 6       | F1       |
| NEWS   | H.PARTISAN (Kiesel et al. (2019))  | partisanship            | 515        | 65       | 65        | 2       | Accuracy |

## C MORE TRAINING DETAILS

We run each hyper-parameter configuration across 3 seeds  $\{0, 1, 2\}$ . We use a batch size of 128 for all end-tasks tasks except H.PARTISAN where we use a batch size of 64. The auxiliary task batch-size, `aux_bsz`, is shared across all the  $n$  sub-sampled auxiliary objectives according to the objective’s weight.

We use the AdamW optimizer (Loshchilov & Hutter (2017)), with weight decay of 0.01 for all experiments.

Table 5: AANG-TD specific Hyper-parameters

| Hyper-parameter            | Values     | Description                                                          |
|----------------------------|------------|----------------------------------------------------------------------|
| <code>aux_lr</code>        | 1.0, 0.1   | Learning rate for factor vectors - $\{W^{All}, W^I, W^T, W^R, W^O\}$ |
| <code>sopt_lr</code>       | 0.1, 0.01  | Learning rate for primary task weighting $\lambda_e$                 |
| <code>nconf_subsamp</code> | 3, 6       | Number of sub-sampled auxiliary tasks.                               |
| <code>learning rate</code> | 1e-3, 1e-4 | Learning rate used for further training of RoBERTa <sub>base</sub>   |
| <code>aux_bsz</code>       | 256        | Batch size of for auxiliary objectives                               |

Table 6: AANG-TD+ED specific Hyper-parameters

| Hyper-parameter            | Values        | Description                                                          |
|----------------------------|---------------|----------------------------------------------------------------------|
| <code>aux_lr</code>        | 1.0, 0.5, 0.1 | Learning rate for factor vectors - $\{W^{All}, W^I, W^T, W^R, W^O\}$ |
| <code>sopt_lr</code>       | 0.1           | Learning rate for primary task weighting $\lambda_e$                 |
| <code>nconf_subsamp</code> | 6, 12, 24     | Number of sub-sampled auxiliary tasks.                               |
| <code>learning rate</code> | 1e-4          | Learning rate used for further training of RoBERTa <sub>base</sub>   |
| <code>aux_bsz</code>       | 1024          | Batch size of for auxiliary objectives                               |

META-TARTAN introduces a dev-head which is trained sporadically during training for estimating the meta-gradients. We use the following hyper-parameters for training this dev-head : we sample 32 examples (8 examples in the case of H.PARTISAN) and perform full batch gradient descent with

Table 7: **AANG** Hyper-parameters for single task auxiliary tasks

| Hyper-parameter | Values           | Description                                                        |
|-----------------|------------------|--------------------------------------------------------------------|
| sopt_lr         | 1.0, 0.1, 0.01   | Learning rate for primary task weighting $\lambda_e$               |
| learning rate   | 1e-3, 1e-4, 5e-5 | Learning rate used for further training of RoBERTa <sub>base</sub> |

a learning rate of 1e-2 for 10 iterations. The dev-head is trained with the AdamW optimizer with weight decay set to 0.1.

We copy the end-task agnostic baseline results from (Dery et al., 2021b) when available. We use the hyper-parameters specified for TAPT in Gururangan et al. (2020) to train for the SE-2016-6 task.

All models were trained on one of two types of gpus: NVIDIA A100 or NVIDIA A6000. All models fit within a single gpu. We used gradient accumulation to expand the effective batch sizes used for our experiments.

## D GENERALIZATION ERROR BOUND FOR END-TASK AWARE TRAINING

### D.1 DEFINITIONS

**Definition D.1.** A function,  $f : \Omega \rightarrow \mathbb{R}$  is  $L$ -Lipschitz if  $\forall u, v \in \text{dom}(f)$ :

$$\|f(u) - f(v)\| \leq L\|u - v\|$$

Note that  $L$ -Lipschitz implies bounded gradients.

$$\|\nabla f(w)\| \leq L \quad \forall w$$

**Definition D.2.** A function,  $f : \Omega \rightarrow \mathbb{R}$  is  $\beta$ -smooth if  $\forall u, v \in \Omega$ :

$$\|\nabla f(u) - \nabla f(v)\| \leq \beta\|u - v\|$$

**Definition D.3.** An update rule,  $G$  is  $\sigma$ -bounded if:

$$\sup_{w \in \Omega} \|w - G(w)\| \leq \sigma$$

Consider the following general setting. There is an unknown distribution  $\mathcal{D}_e$  over examples from some space  $\mathcal{Z}$ . We receive a sample  $S = (z_1, \dots, z_{N_e})$  of  $N_e$  examples drawn i.i.d. from  $\mathcal{D}_e$ . Our goal is to find a model  $w$ , that parameterizes the function  $f_e$ , with small population risk defined as:

**Definition D.4. Population Risk**

$$R[w] = \mathbb{E}_{z \sim \mathcal{D}_e} f_e(w; z)$$

**Definition D.5. Empirical Risk**

Since we have a finite number of samples, we can only compute the empirical risk which is :

$$R_S[w] = \frac{1}{N_e} \sum_i f_e(w; z_i),$$

Let  $A$  be a potentially randomized algorithm (such as Stochastic Gradient Descent) that is a function of the  $S$  such that  $w = A(S)$ .

**Definition D.6. Generalization Error**  $\epsilon_{gen}(A, N_e)$

$$\epsilon_{gen}(A, N_e) = \mathbb{E}_{S, A} [R_S[A(S)] - R[A(S)]]$$

**Definition D.7. Uniform Stability**

A randomized algorithm  $A$  is  $\epsilon$ -uniformly stable if for all data sets  $S, S' \in \mathcal{Z}$ ,  $|S| = |S'| = N_e$  such that  $S$  and  $S'$  differ in at most one example, we have

$$\sup_z \mathbb{E}_A [f_e(A(S); z) - f_e(A(S'); z)] \leq \epsilon$$

Here, the expectation is taken only over the internal randomness of  $A$ . We will denote by  $\epsilon_{stab}(A, N_e)$  the infimum over all  $\epsilon$  for which the above holds.

## D.2 RELEVANT THEOREMS

**Theorem D.1** (Uniform Stability implies Generalization in expectation). *Let Algorithm A be  $\epsilon$ -uniformly stable. Then,*

$$\epsilon_{gen}(A, N_e) = \left| \mathbf{E}_{S,A} [R_S[A(S)] - R[A(S)]] \right| \leq \epsilon_{stab}(A, N_e)$$

For full proof see Theorem 2.2 of [Hardt et al. \(2016\)](#).

**Theorem D.2** (Stochastic Gradient Method is stable). *Assume that  $f_e(\cdot; z) \in [0, 1]$  is an  $L$ -Lipschitz and  $\beta_e$ -smooth loss function for every  $z$ . Suppose that we run SGM for  $T$  steps with monotonically non-increasing step sizes  $\alpha_t \leq \frac{c}{t}$ . Then, SGM has uniform stability with :*

$$\epsilon_{sgm} \leq \frac{1 + \frac{1}{q}}{N_e - 1} (2cL^2)^{\frac{1}{q+1}} T^{\frac{q}{q+1}}$$

where  $q = \beta_e c$

We can simplify this to only terms involving  $T$  and  $N_e$

$$\epsilon_{sgm} \lesssim \frac{T^{1 - \frac{1}{c\beta_e + 1}}}{N_e} \quad (2)$$

*Proof.* For the full proof, see Theorem 3.12 of [Hardt et al. \(2016\)](#)

□

## D.3 GROWTH FUNCTIONS

**Lemma D.3** (Growth Recursion Under Dynamic Sampling). *We consider the Stochastic Gradient update rule  $G : \Omega \rightarrow \Omega$  :*

$$G_f(w) = w - \alpha \nabla f(w)$$

*Fix an arbitrary sequence of updates  $G_{f_1}, \dots, G_{f_T}$  and another  $G'_{f_1}, \dots, G'_{f_T}$ . Let  $w_0 = w'_0$  be a starting point in  $\Omega$  given that  $f : \Omega \rightarrow \mathbb{R}$  and define*

$$\delta_t = \mathbb{E}_{f_1 \dots f_t \sim \mathcal{P}_\lambda} [\|w_t - w'_t\|]$$

*where  $w_t, w'_t$  are defined recursively through :*

$$w_t = G_{f_t}(w_{t-1}) \quad w'_t = G'_{f_t}(w'_{t-1}) \quad t \geq 0$$

*Then we have the recurrence relation :*

$$\begin{aligned} \delta_0 &= 0 \\ \delta_{t+1} &\leq \begin{cases} \min \left\{ (1 + \alpha\lambda_1\beta_1)\delta_t + \alpha\lambda_2(\Delta + 2L), \right. & G_{f_t} = G'_{f_t} \\ \delta_t + 2\sigma_t & G_{f_t}, G'_{f_t} \text{ are } \sigma\text{-bounded} \end{cases} \end{aligned}$$

*Note that  $\mathcal{P}_f$  is a distribution over the support  $\{f^1, f^2\}$  according to probabilities  $\{\lambda_1, \lambda_2 \mid \lambda_1 + \lambda_2 = 1\}$ .  $\{f_1, f_2\}$  have smoothness  $\beta_1, \beta_2$  respectively.*

*Proof.* The second bound on  $\delta_t$  is taken directly from Lemma 2.5 of [Hardt et al. \(2016\)](#). We now derive the first-half of the first bound

$$\begin{aligned}
\delta_{t+1} &= \mathbb{E}_{f_1 \dots f_{t+1} \sim \mathcal{P}_\lambda} [\|w_{t+1} - w'_{t+1}\|] \\
&= \mathbb{E}_{f_1 \dots f_t \sim \mathcal{P}_\lambda} \left[ \lambda_1 \|G_{f^1}(w_t) - G'_{f^1}(w'_t)\| + \lambda_2 \|G_{f^2}(w_t) - G'_{f^2}(w'_t)\| \right] \\
&= \mathbb{E}_{f_1 \dots f_t \sim \mathcal{P}_\lambda} \left[ \lambda_1 \|w_t - \alpha \nabla f^1(w_t) - w'_t + \alpha \nabla f^1(w'_t)\| + \lambda_2 \|w_t - \alpha \nabla f^2(w_t) - w'_t + \alpha \nabla f^2(w'_t)\| \right] \\
&\leq \mathbb{E}_{f_1 \dots f_t \sim \mathcal{P}_\lambda} [\|w_t - w'_t\|] + \alpha \mathbb{E}_{f_1 \dots f_t \sim \mathcal{P}_\lambda} \left( \lambda_1 \|\nabla f^1(w'_t) - \nabla f^1(w_t)\| + \lambda_2 \|\nabla f^2(w'_t) - \nabla f^2(w_t)\| \right) \\
&\quad \text{(Triangle Inequality used for above step)} \\
&= \delta_t + \alpha \mathbb{E}_{f_1 \dots f_t \sim \mathcal{P}_\lambda} \left( \lambda_1 \|\nabla f^1(w'_t) - \nabla f^1(w_t)\| + \lambda_2 \|\nabla f^2(w'_t) - \nabla f^2(w_t)\| \right) \\
&\quad \text{(Without Loss of Generality, let } \beta_1 \leq \beta_2 \text{)} \\
&\leq \delta_t + \alpha \mathbb{E}_{f_1 \dots f_t \sim \mathcal{P}_\lambda} \left[ \lambda_1 \beta_1 \|w_t - w'_t\| + \lambda_2 \|\nabla f^2(w'_t) - \nabla f^2(w_t)\| \right] \quad \text{(Smoothness)} \\
&= \delta_t + \alpha \lambda_1 \beta_1 \delta_t + \alpha \lambda_2 \mathbb{E}_{f_1 \dots f_t \sim \mathcal{P}_\lambda} [\|\nabla f^2(w'_t) - \nabla f^2(w_t)\|] \quad \text{(Triangle Inequality)} \\
&= (1 + \alpha \lambda_1 \beta_1) \delta_t + \alpha \lambda_2 \left\| \nabla f^2(w'_t) - \nabla f^1(w'_t) + \nabla f^1(w'_t) - \nabla f^2(w_t) \right\| \quad \text{(add zero)} \\
&\leq (1 + \alpha \lambda_1 \beta_1) \delta_t + \alpha \lambda_2 \left( \|\nabla f^2(w'_t) - \nabla f^1(w'_t)\| + \|\nabla f^1(w'_t) - \nabla f^2(w_t)\| \right) \quad \text{(Triangle Inequality)} \\
&\leq (1 + \alpha \lambda_1 \beta_1) \delta_t + \alpha \lambda_2 \left( \Delta + \|\nabla f_1(w'_t) - \nabla f_2(w_t)\| \right) \quad \text{Using Assumption A.1} \\
&\leq (1 + \alpha \lambda_1 \beta_1) \delta_t + \alpha \lambda_2 \left( \Delta + \|\nabla f_1(w'_t)\| + \|\nabla f_2(w_t)\| \right) \quad \text{Triangle Inequality} \\
&\leq (1 + \alpha \lambda_1 \beta_1) \delta_t + \alpha \lambda_2 (\Delta + 2L) \quad L\text{-Lipschitz function}
\end{aligned}$$

To obtain the second half of the first bound :

$$\begin{aligned}
\delta_{t+1} &= \mathbb{E}_{f_1 \dots f_{t+1} \sim \mathcal{P}_\lambda} [\|w_{t+1} - w'_{t+1}\|] \\
&= \mathbb{E}_{f_1 \dots f_t \sim \mathcal{P}_\lambda} \left[ \lambda_1 \|G_{f^1}(w_t) - G'_{f^1}(w'_t)\| + \lambda_2 \|G_{f^2}(w_t) - G'_{f^2}(w'_t)\| \right] \\
&= \mathbb{E}_{f_1 \dots f_t \sim \mathcal{P}_\lambda} \left[ \lambda_1 \|w_t - \alpha \nabla f^1(w_t) - w'_t + \alpha \nabla f^1(w'_t)\| + \lambda_2 \|w_t - \alpha \nabla f^2(w_t) - w'_t + \alpha \nabla f^2(w'_t)\| \right] \\
&\leq \mathbb{E}_{f_1 \dots f_t \sim \mathcal{P}_\lambda} [\|w_t - w'_t\|] + \alpha \mathbb{E}_{f_1 \dots f_t \sim \mathcal{P}_\lambda} \left( \lambda_1 \|\nabla f^1(w'_t) - \nabla f^1(w_t)\| + \lambda_2 \|\nabla f^2(w'_t) - \nabla f^2(w_t)\| \right) \\
&\quad \text{(Triangle Inequality used for above step)} \\
&\leq \delta_t + \alpha \mathbb{E}_{f_1 \dots f_t \sim \mathcal{P}_\lambda} \left[ \lambda_1 \beta_1 \|w_t - w'_t\| + \lambda_2 \beta_2 \|w_t - w'_t\| \right] \quad \text{(Smoothness)} \\
&= \delta_t + \alpha \lambda_1 \beta_1 \mathbb{E}_{f_1 \dots f_t \sim \mathcal{P}_\lambda} [\|w_t - w'_t\|] + \alpha \lambda_2 \beta_2 \mathbb{E}_{f_1 \dots f_t \sim \mathcal{P}_\lambda} [\|w_t - w'_t\|] \\
&= \delta_t + \alpha (\lambda_1 \beta_1 + \lambda_2 \beta_2) \delta_t \\
&= (1 + \alpha (\lambda_1 \beta_1 + \lambda_2 \beta_2)) \delta_t
\end{aligned}$$

□

#### D.4 STABILITY OF DYNAMIC SAMPLING

We repeat the description of our Auxiliary Learning with Dynamic Sampling Setting here for ease of access.

**Setting :** We are given an auxiliary objective  $f_a(\cdot; z) \in [0, 1]$  with  $N_a$  samples  $S_a = (z_1, \dots, z_{N_a})$  from the distribution  $\mathcal{D}_a$ . At any iteration of SGD, we sample a choice of either the end-task function  $f_e$  or the auxiliary objective  $f_a$  according to the probabilities  $\lambda_e, \lambda_a \mid \lambda_e + \lambda_a = 1$ . Given the chosen objective, we sample a data-point and perform stochastic gradient descent (SGD) based on the sampled data-point.

An equivalent way to instantiate this procedure to create  $S_A$  by drawing  $N' = N_e + N_a$  total samples from the end-task and auxiliary task according to  $\mathcal{P}_\lambda$ .  $S'_A$  is then created by replacing 1 end-task sample in  $S_A$ . At each step, a sample is drawn from a distribution :  $z_i, z'_i \sim P_{S_A}, P_{S'_A}$  and a gradient step is taken on the function corresponding to the set the sample was drawn from.

**Lemma D.4** (Stability of dynamic sampling). *We denote the outputs of  $T$  steps of SGM on  $S_A$  and  $S'_A$  with the dynamically sampled functions, as  $w_T$  and  $w'_T$  respectively. Then, for every  $z_e \in Z_e$  and every  $t_0 > 0$ , under both the random update rule and the random permutation rule, we have :*

$$\mathbb{E}[f_e(w_T; z) - f_e(w'_T; z)] \leq \frac{\gamma t_0}{N'} \sup_{w, z_e} f_e(w; z_e) + L\mathbb{E}[\delta_T | \delta_{t_0} = 0]$$

Where  $N' = N_e + N_a$  and  $\gamma = \frac{\lambda_e \cdot N'}{N_e} = \frac{\lambda_e}{\lambda^*}$ .

*Proof.* Let  $\mathcal{E} = 1[\delta_{t_0} = 0]$  denote the event that  $\delta_{t_0} = 0$ . We have

$$\begin{aligned} \mathbb{E}[f_e(w_T; z) - f_e(w'_T; z)] &= P\{\mathcal{E}\} \mathbb{E}[|f_e(w_T; z) - f_e(w'_T; z)| | \mathcal{E}] \\ &\quad + P\{\mathcal{E}^c\} \mathbb{E}[|f_e(w_T; z) - f_e(w'_T; z)| | \mathcal{E}^c] \\ &\leq \mathbb{E}[|f_e(w_T; z) - f_e(w'_T; z)| | \mathcal{E}] + P\{\mathcal{E}^c\} \cdot \sup_{w, z_e} f_e(w; z_e) \\ &\quad \text{because } f_e \text{ is non-negative} \\ &\leq L\mathbb{E}[\|w_T - w'_T\| | \mathcal{E}] + P\{\mathcal{E}^c\} \cdot \sup_{w, z_e} f_e(w; z_e) \\ &\quad \text{because } f_e \text{ is } L\text{-Lipschitz} \end{aligned} \tag{3}$$

We now proceed to bound  $P\{\mathcal{E}^c\}$ . Let  $i_* \in [N']$  denote the position in which  $S_A, S'_A$  differ and consider the random variable  $I$  assuming the index of the first time step in which SGM uses the example  $z_e^{i_*}$ . Note that when  $I > t_0$ , then we must have that  $\delta_{t_0} = 0$  since the two samples are identical up until this point.

$$P\{\mathcal{E}^c\} = P\{\delta_0 \neq 0\} \leq P\{I \leq t_0\}$$

Using the selection rule specified above (sample either  $f_e, f_a$  according to the probabilities  $\lambda_e, \lambda_a$  and then sample uniformly from the selected task data) we have that :

$$P\{I \leq t_0\} = \sum_{t=1}^{t_0} P\{I = t\} = \sum_{t=1}^{t_0} (\lambda_e \cdot \frac{1}{N_e}) = \frac{\lambda_e t_0}{N_e} = \frac{\gamma t_0}{N'}$$

□

**Theorem D.5** (Stability Bound on Dynamic Sampling). *Assume that  $f_e(\cdot; z_e), f_a(\cdot; z_a) \in [0, 1]$  are  $L$ -Lipschitz and  $\beta_e$  and  $\beta_a$ -smooth loss functions. Consider that we have  $N' = N_e + N_a$  total samples where  $f_e$  and  $f_a$  have  $N_e$  and  $N_a$  samples respectively. Suppose that we run SGM for  $T$  steps with monotonically non-increasing step sizes  $\alpha_t \leq \frac{c}{t}$  by dynamically sampling the tasks according to  $\lambda_e$  and  $\lambda_a$ . Then, with respect to  $f_e$ , SGM has uniform stability with :*

$$\epsilon_{\text{stab}} \leq \left(1 + \frac{1}{c\bar{\beta}}\right) \left(\frac{2\gamma L^2 c}{N' - \gamma} + \rho L c\right)^{\frac{1}{c\bar{\beta}+1}} \left(\frac{\gamma T}{N'}\right)^{\frac{c\bar{\beta}}{1+c\bar{\beta}}}$$

Where  $\gamma = \frac{\lambda_e N'}{N_e}$

Given that  $\beta^* = \min\{\beta_e, \beta_a\}$  and  $\lambda^*$  is the corresponding weighting of the function with smaller smoothness.

Depending on which one gives a tighter bound the pair  $(\bar{\beta}, \rho)$  can be :

$$(\bar{\beta}, \rho)_1 = (\lambda^* \beta^*, (1 - \lambda^*)(\Delta + 2L))$$

or

$$(\bar{\beta}, \rho)_2 = (\lambda_e \beta_e + \lambda_a \beta_a, 0)$$

When  $(\bar{\beta}, \rho)_1$  gives the tighter bound, we can simplify to :

$$\epsilon_{\text{gen}} \lesssim (\Delta)^{\frac{1}{1+c\lambda^*\beta^*}} \left( \frac{\gamma T}{N'} \right)^{1 - \frac{1}{c\lambda^*\beta^*+1}}$$

As presented in Section 4

*Proof.* Let  $S_A, S'_A$  be two sample of size  $N' = N_e + N_a$  as described in lemma D.4. Consider the gradient updates  $G_{f_1}, \dots, G_{f_T}$  and  $G'_{f_1}, \dots, G'_{f_T}$  induced by running SGM on samples  $S_A$  and  $S'_A$  respectively. Let  $w_T$  and  $w'_T$  denote the corresponding outputs of SGM. By lemma D.4 we have :

$$\mathbb{E}|f_e(w_T; z) - f_e(w'_T; z)| \leq \frac{\gamma t_0}{N'} \sup_{w, z_e} f_e(w; z_e) + L\mathbb{E}[\delta_T | \delta_{t_0} = 0] \quad (4)$$

Let  $\Psi_T = \mathbb{E}[\delta_T | \delta_{t_0} = 0]$ . We will bound  $\Psi_T$  as function of  $t_0$  and then minimize for  $t_0$ . Note the following :

- At any step  $t$ , with probability  $(1 - \frac{\gamma}{N'})$ , the sample selected is the same in both  $S_A$  and  $S'_A$ . In this case  $G_{f_t} = G'_{f_t}$  and we use the corresponding expansivity rule from lemma D.4. This gives :

$$\delta_{t+1} \leq \min \left\{ (1 + \alpha_t \lambda^* \beta^*) \delta_t + \alpha_t (1 - \lambda^*) (\Delta + 2L), (1 + \alpha_t (\lambda_e \beta_e + \lambda_a \beta_a)) \delta_t \right\}$$

Where  $\beta^* = \min\{\beta_e, \beta_a\}$  and  $\lambda^*$  is the corresponding weighting of the function with smaller smoothness. To avoid deriving the bound independently for each case, we perform a variable substitution that captures the two cases :

$$\delta_{t+1} \leq (1 + \alpha_t \bar{\beta}) \delta_t + \alpha_t \rho$$

$\bar{\beta} = \{\lambda^* \beta^*, \lambda_e \beta_e + \lambda_a \beta_a\}$  and  $\rho = \{(1 - \lambda^*)(\Delta + 2L), 0\}$ . We can present the final bound in terms of these variables which can be substituted depending on the minimizer.

- With probability  $\frac{\gamma}{N'}$  the selected example is different. Note that in this case, we know that we are evaluating the end-task function  $f_e$ . We use that both  $G_{f_t}$  and  $G'_{f_t}$  are  $(\sigma_t = \alpha_t L)$ -bounded according to lemma D.3 since  $f_e$  is  $L$ -Lipschitz.

Combining the above we have :

$$\begin{aligned} \Psi_{t+1} &\leq (1 - \frac{\gamma}{N'}) \left( (1 + \alpha_t \bar{\beta}) \Psi_t + \alpha_t \rho \right) + \frac{\gamma}{N'} (\Psi_t + 2\alpha_t L) \\ &= \left( \frac{\gamma}{N'} + (1 - \frac{\gamma}{N'}) (1 + \alpha_t \bar{\beta}) \right) \Psi_t + \frac{2\gamma \alpha_t L}{N'} + \alpha_t (1 - \frac{\gamma}{N'}) \rho \\ &= \left( 1 + (1 - \frac{\gamma}{N'}) \alpha_t \bar{\beta} \right) \Psi_t + \frac{\alpha_t (2\gamma L + (N' - \gamma) \rho)}{N'} \\ &\leq \left( 1 + (1 - \frac{\gamma}{N'}) \frac{c}{t} \bar{\beta} \right) \Psi_t + \frac{c(2\gamma L + (N' - \gamma) \rho)}{tN'} \\ &\leq \exp \left( (1 - \frac{\gamma}{N'}) \frac{c}{t} \bar{\beta} \right) \Psi_t + \frac{c(2\gamma L + (N' - \gamma) \rho)}{tN'} \\ &\quad \text{We use } 1 + x \leq \exp(x) \forall x \\ &\leq \exp \left( (1 - \frac{\gamma}{N'}) \frac{c}{t} \bar{\beta} \right) \Psi_t + \frac{c\bar{\rho}}{tN'} \\ &\quad \text{Where } \bar{\rho} = (2\gamma L + (N' - \gamma) \rho) \end{aligned} \quad (5)$$

We can unwind the recurrence until  $\Psi_{t_0} = 0$ .

$$\begin{aligned}
\Psi_T &\leq \sum_{t=t_0+1}^T \left( \prod_{k=t+1}^T \exp\left((1 - \frac{\gamma}{N'}) \frac{c\bar{\beta}}{k}\right) \right) \left( \frac{c\bar{\rho}}{tN'} \right) \\
&= \sum_{t=t_0+1}^T \left( \frac{c\bar{\rho}}{tN'} \right) \exp\left((1 - \frac{\gamma}{N'}) c\bar{\beta} \sum_{k=t+1}^T \frac{1}{k}\right) \\
&\leq \sum_{t=t_0+1}^T \left( \frac{c\bar{\rho}}{tN'} \right) \exp\left((1 - \frac{\gamma}{N'}) c\bar{\beta} \log\left(\frac{T}{t}\right)\right) \\
&= \frac{c\bar{\rho} T^{c\bar{\beta}(1-\frac{\gamma}{N'})}}{N'} \sum_{t=t_0+1}^T t^{-c\bar{\beta}(1-\frac{\gamma}{N'})-1}
\end{aligned} \tag{6}$$

We can upper bound the sum over  $t$  with an integral + drop negative terms

$$\begin{aligned}
&\leq \frac{c\bar{\rho}}{N' c\bar{\beta}(1-\frac{\gamma}{N'})} \left( \frac{T}{t_0} \right)^{c\bar{\beta}(1-\frac{\gamma}{N'})} \\
&= \frac{\bar{\rho}}{\bar{\beta}(N' - \gamma)} \left( \frac{T}{t_0} \right)^{c\bar{\beta}(1-\frac{\gamma}{N'})} \\
&\leq \frac{\bar{\rho}}{\bar{\beta}(N' - \gamma)} \left( \frac{T}{t_0} \right)^{c\bar{\beta}}
\end{aligned}$$

Plugging this bound back into Equation 4 and using the fact that  $f_e \in [0, 1]$ :

$$\mathbb{E}|f_e(w_T; z) - f_e(w'_T; z)| \leq \frac{\gamma t_0}{N'} + \frac{L\bar{\rho}}{\bar{\beta}(N' - \gamma)} \left( \frac{T}{t_0} \right)^{c\bar{\beta}} \tag{7}$$

We let  $q^* = c\bar{\beta}$ , we can minimize the R.H.S by setting :

$$t_0 = \left( \frac{N' L c \bar{\rho}}{\gamma(N' - \gamma)} \right)^{\frac{1}{q^*+1}} T^{\frac{q^*}{q^*+1}}$$

Plugging this in gives us :

$$\begin{aligned}
\mathbb{E}|f_e(w_T; z) - f_e(w'_T; z)| &\leq \left( \frac{(1 + \frac{1}{c\bar{\beta}})}{N'} \right) \left( \frac{N' L c (2\gamma L + (N' - \gamma)\rho)}{(N' - \gamma)} \right)^{\frac{1}{c\bar{\beta}+1}} (\gamma T)^{\frac{c\bar{\beta}}{1+c\bar{\beta}}} \\
&= \left( 1 + \frac{1}{c\bar{\beta}} \right) \left( \frac{2\gamma L^2 c}{N' - \gamma} + \rho L c \right)^{\frac{1}{c\bar{\beta}+1}} \left( \frac{\gamma T}{N'} \right)^{\frac{c\bar{\beta}}{1+c\bar{\beta}}}
\end{aligned} \tag{8}$$

Recall that :

$$\begin{aligned}
\bar{\beta} &= \{\lambda^* \beta^*, \lambda_e \beta_e + \lambda_a \beta_a\} \\
\rho &= \{(1 - \lambda^*)(\Delta + 2L), 0\}
\end{aligned}$$

We can choose whichever of the pairs for  $\bar{\beta}, \rho$  that minimizes the bound :  $\square$

## E DISCUSSION OF GENERALIZATION ERROR BOUNDS

### E.1 WHAT DOES THEOREM D.5 SAY.

We consider the setting where

$$\begin{aligned}
\bar{\beta} &= \lambda^* \beta^* \\
\rho &= (1 - \lambda^*)(\Delta + 2L)
\end{aligned}$$

Assuming the  $\rho$  term dominates Equation 8 in this setting is :

$$\begin{aligned} \epsilon_{\text{gen}}^{\text{auxdyn}} &\leq \epsilon_{\text{stab}}^{\text{auxdyn}}|_{(\bar{\beta}, \rho)_1} \lesssim \sqrt[1+c\bar{\beta}]{(1-\lambda^*)(\Delta+2L)} \left(\frac{\gamma T}{N'}\right)^{\frac{c\bar{\beta}}{1+c\bar{\beta}}} \\ &\lesssim (\Delta)^{\frac{1}{1+c\lambda^*\beta^*}} \left(\frac{\gamma T}{N'}\right)^{1-\frac{1}{c\lambda^*\beta^*+1}} \end{aligned} \quad \text{This is Equation 1 from Section 4} \quad (9)$$

In going from the first line to the second we consider the setting where  $\Delta \gg 2L$ . This is a case where the auxiliary task is sufficiently different from the primary task. Some observations about this setting:

1. Smaller  $\Delta$  implies auxiliary task is similar to main task and leads to improving the bound.
2. Dependence of the bound on  $N'$  is a bit more nuanced. **Note that increasing  $N'$  increases  $\gamma$  unless we reduce  $\lambda_e$  appropriately.** Remember that  $\lambda_e$  is the rate at which we sample the primary task. Thus, if we add more auxiliary data but still sample the primary task at the original rate, then we are effectively ignoring the extra auxiliary data.
3. It might be tempting to assume that we can get arbitrary improvements in this setting by setting  $\lambda_e = 0$ . However, **note that whilst this might reduce the generalization error**, it means that we are seeing none of the end-task which would result in large **increase in the training error**
4. Note that  $(\bar{\beta} = \lambda^*\beta^* \leq \beta_e)$  always. So we get improvements on the dependence on  $T$  compared to Theorem D.2
5. We can optimize  $\lambda_e, \lambda_a$  to minimize  $\epsilon_{\text{stab}}^{\text{auxdyn}}$ .
